# Supplementary material for: Metabolic Pathways for Observed Impacts of Crop Load on Floral Induction in Apple
Source: MDPI journal article supplement (doi:10.3390/ijms23116019), 2022-05-27
Supplement: s1 [file s1]

# High-throughput analysis of amino acids for protein quantification in plant and animal-derived samples using high resolution mass spectrometry

Priyanka Reddy <sup>1</sup>, Tim Plozza <sup>1</sup>, Vilnis Ezernieks <sup>1</sup>, Dario Stefanelli <sup>2</sup>, Alessio Scalisi <sup>3</sup>, Ian Goodwin <sup>3,4</sup> and Simone Rochfort <sup>1,5,\*</sup>

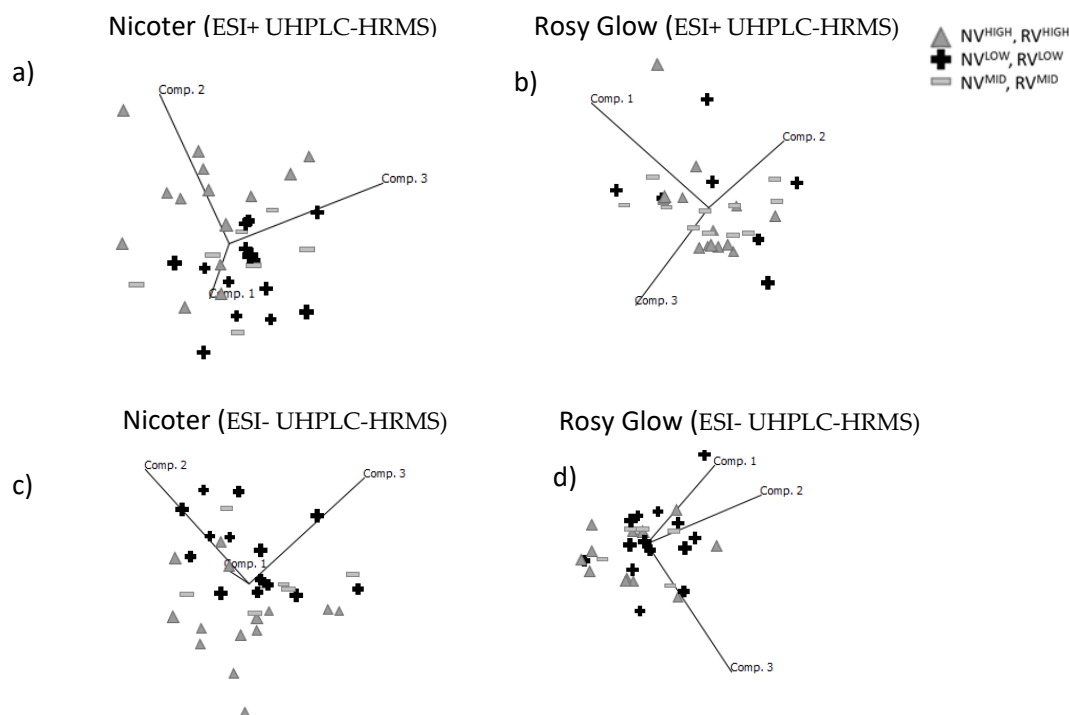

**Supplementary Figure S1.** PCA scores plot of ESI+ UHPLC-HRMS of (a) Nicoter and (b) Rosy glow and ESI- UHPLC-HRMS of (c) Nicoter and (d) Rosy Glow, acquired from the aqueous extracts of apple spur buds of 'Nicoter' crop load treatments:  $NV^{HIGH}$  (1-2 fruit cm<sup>2</sup> TCSA;  $n=14$ ),  $NV^{MID}$  (4.43 fruit cm<sup>2</sup> TCSA;  $n=7$ ) and  $NV^{LOW}$  (6-7 fruit cm<sup>2</sup> TCSA;  $n=14$ ) and 'Rosy Glow' crop load treatments:  $RV^{HIGH}$  (1-4 fruit cm<sup>2</sup> TCSA;  $n=13$ ),  $RV^{MID}$  (8.77 fruit cm<sup>2</sup> TCSA;  $n=6$ ) and  $RV^{LOW}$  (11-14 fruit cm<sup>2</sup> TCSA;  $n=14$ ).

**Supplementary Table S1.** P-values associated with the linear model (y (metabolite response) ~ return bloom) for 'Nicoter' (NV<sup>HIGH</sup>, NV<sup>MID</sup>, NV<sup>LOW</sup>) and T-test and fold change of NV<sup>HIGH</sup> vs NV<sup>LOW</sup> of the targeted phytohormones and structural derivatives.

| Plant hormone               | Linear model         | NV <sup>HIGH</sup> vs NV <sup>LOW</sup> | Fold change of                          |
|-----------------------------|----------------------|-----------------------------------------|-----------------------------------------|
|                             | P-value<br>(Nicoter) | T-test<br>(p Value)                     | NV <sup>HIGH</sup> vs NV <sup>LOW</sup> |
| adenine                     | 0.460                | 0.480                                   | 0.035                                   |
| adenosine                   | 0.364                | 0.367                                   | -0.208                                  |
| tryptophan                  | 0.054                | 0.086                                   | -0.310                                  |
| 2-oxindole-3-acetic acid    | 0.096                | 0.085                                   | 0.303                                   |
| gibberellic acid            | 0.650                | 0.703                                   | 0.063                                   |
| indole-3-acetic acid        | 0.656                | 0.849                                   | 0.049                                   |
| salicylic acid              | 0.416                | 0.411                                   | 0.085                                   |
| abscisic acid               | 0.007                | 0.011                                   | 0.266                                   |
| indole-3-acetonitrile       | 0.412                | 0.754                                   | -0.124                                  |
| methyl-indole-3-acetic acid | 0.929                | 0.497                                   | 0.129                                   |
| methyl jasmonate            | 0.899                | 0.857                                   | -0.057                                  |
| tryptamine                  | ND                   | ND                                      | ND                                      |

**Supplementary Table S2.** P-values associated with the linear model (y (metabolite response) ~ return bloom) for 'Rosy Glow' (RV<sup>HIGH</sup>, RV<sup>MID</sup>, RV<sup>LOW</sup>) and T-test and fold change of RV<sup>HIGH</sup> vs RV<sup>LOW</sup> of the targeted phytohormones and structural derivatives.

| Plant hormone               | Linear model           | RV <sup>HIGH</sup> vs RV <sup>LOW</sup> | Fold change of RV <sup>HIGH</sup> |
|-----------------------------|------------------------|-----------------------------------------|-----------------------------------|
|                             | P-value<br>(Rosy Glow) | T-test<br>(p Value)                     | vs RV <sup>LOW</sup>              |
| adenine                     | 0.188                  | 0.331                                   | 0.102                             |
| adenosine                   | 0.892                  | 0.849                                   | 0.033                             |
| tryptophan                  | 0.232                  | 0.197                                   | -0.254                            |
| 2-oxindole-3-acetic acid    | 0.504                  | 0.500                                   | 0.081                             |
| gibberellic acid            | 0.223                  | 0.212                                   | -0.080                            |
| indole-3-acetic acid        | 0.773                  | 0.874                                   | -0.049                            |
| salicylic acid              | 0.181                  | 0.224                                   | 0.189                             |
| abscisic acid               | 0.310                  | 0.546                                   | 0.043                             |
| indole-3-acetonitrile       | 0.590                  | 0.530                                   | -0.054                            |
| methyl-indole-3-acetic acid | 0.546                  | 0.274                                   | 0.201                             |
| methyl jasmonate            | 0.517                  | 0.344                                   | -0.142                            |
| tryptamine                  | ND                     | ND                                      | ND                                |

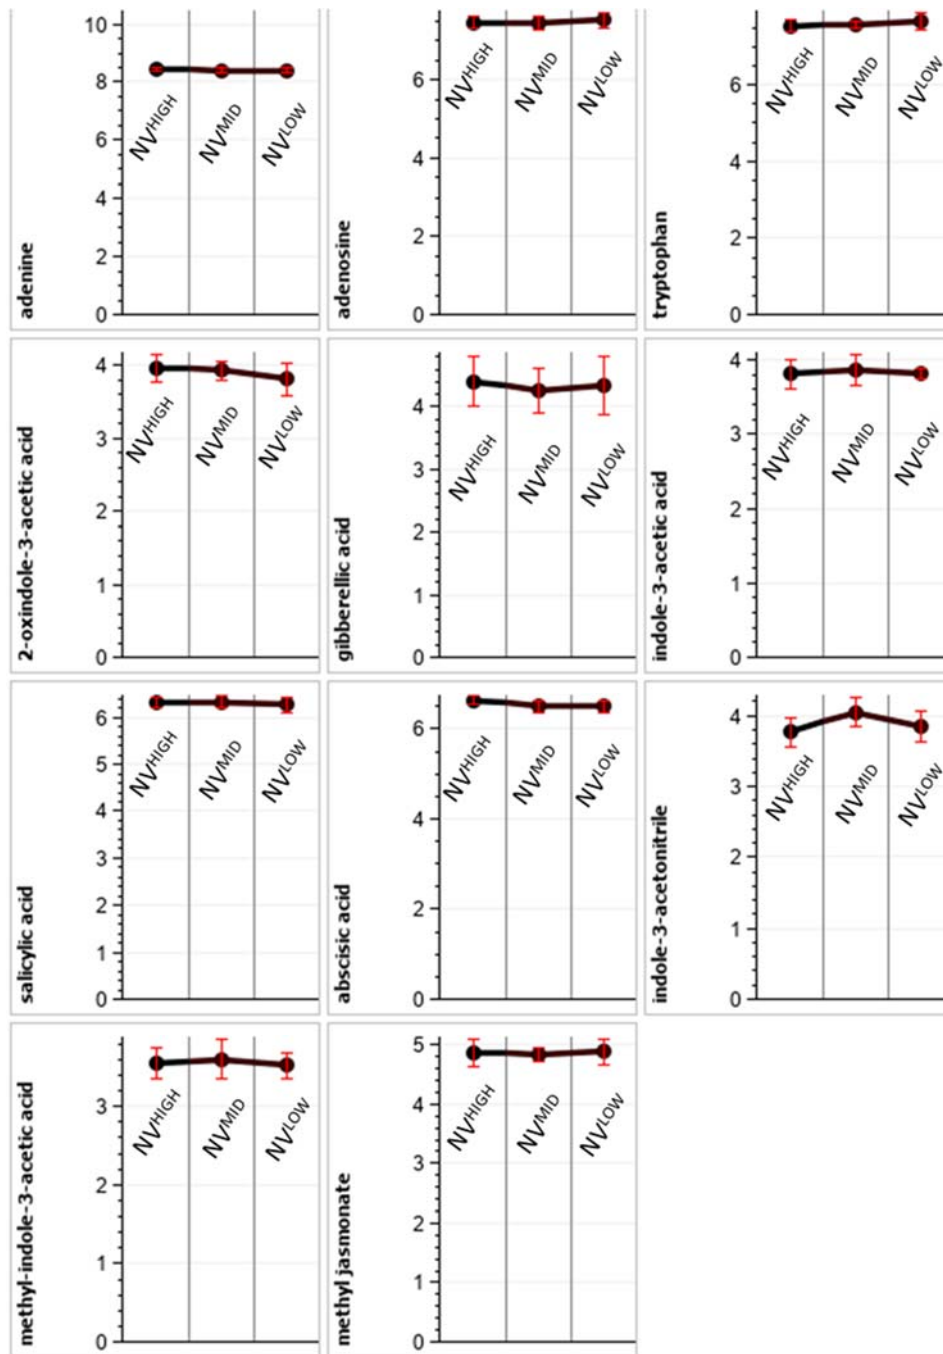

**Supplementary Figure S2.** Line graphs comparing relative abundances (log<sub>10</sub> transformed) of NV<sup>HIGH</sup>, NV<sup>MID</sup>, NV<sup>LOW</sup> treatments of individual target plant hormones and related structural derivatives. Tryptamine was not detected in the samples. All data are mean ±SD.

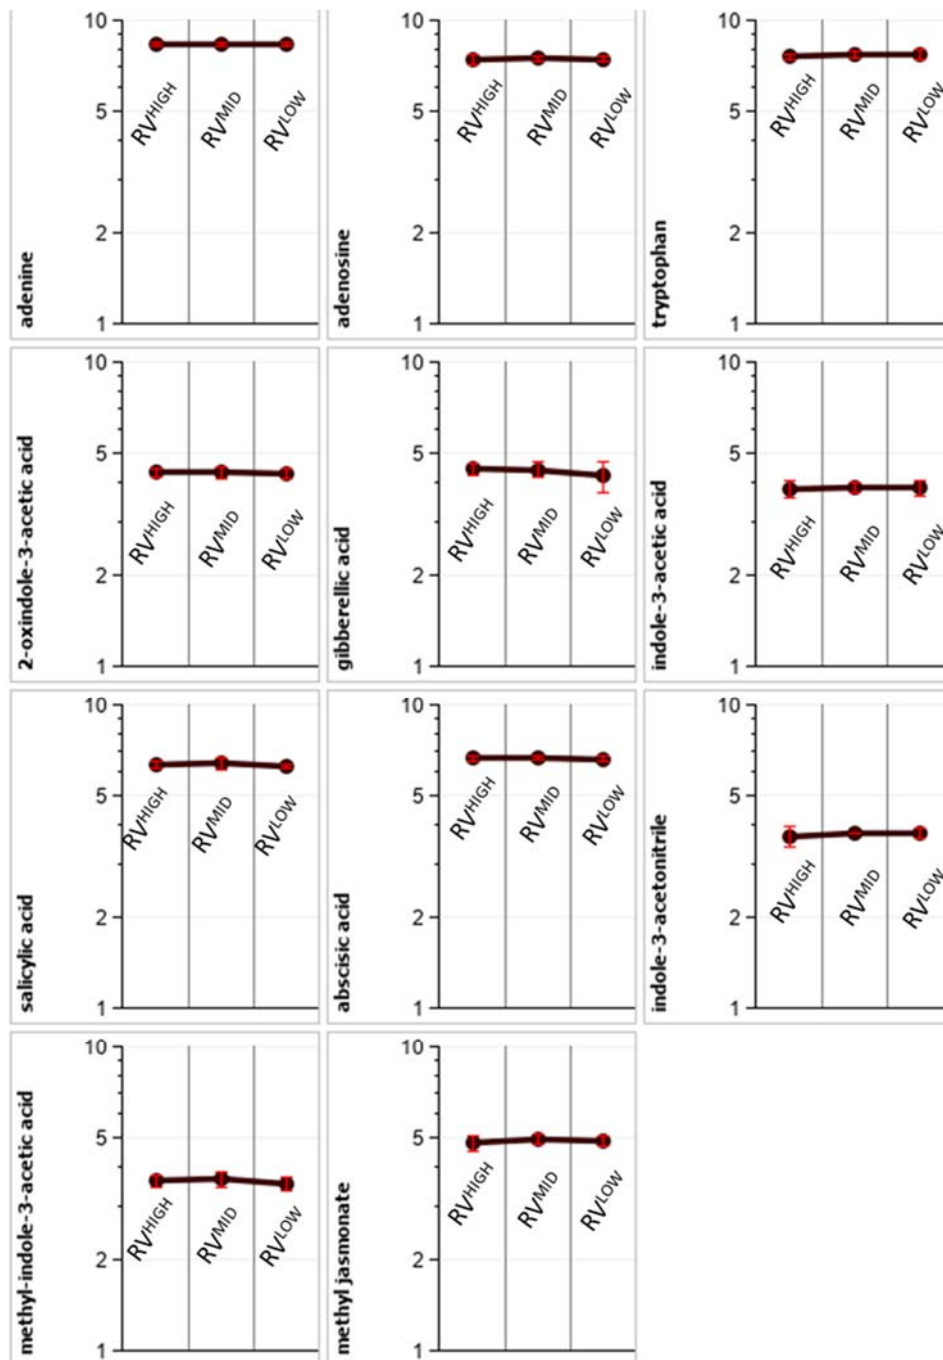

**Supplementary Figure S3.** Line graphs comparing relative abundances (log<sub>10</sub> transformed) of  $RV^{HIGH}$ ,  $RV^{MID}$ ,  $RV^{LOW}$  treatments of individual target plant hormones and related structural derivatives. Tryptamine was not detected in the samples. All data are mean  $\pm$ SD.
